# Supplementary material
Source: publisher figshare collection journal article supplement (https://acs.figshare.com/ndownloader/files/7303382)
Supplement: Supplementary file 1 [file 7303382]

## Sheet: Overview
	1-butene Isotopomer Analysis
	C4H8 Experimental Fragmentation Pattern						Initial Isotopomer Distribution (enter values between 0 and 1)								Assumptions
	m/z	Relative Abundance (%)						C2D4	C2D3H	C2D2H2	C2DH3	C2H4			1. H and D have the same probability of fragmenting in the mass spectrometer.
	48	0.59						1	0	0	0	1			2. As constructed, the model assumes that the abundance of 13C is the same in the inital incorporated into the resulting 1-butene.
	49	3.46													3. The model accounts for the abundance 13C using the specral ions m/z = 48 through m/z = 56, and will not function properly when the major fragmentation peaks do not fall within this range (i.e when there is a higher 13C abundance). An alternative matrix can be defined on the spreadsheet labelled "13C corrrections" if changes are required.
	50	12.43
	51	10.27
	52	3.05
	53	13.76
	54	4.9
	55	47.06
	56	100
	13C Abundance (%)	1.109
	Theoretical Fragmentation Patterns
	m/z	Normalized Predicted Cossee-Arlman Fragmentation Pattern	Normalized Predicted Oxidative Coupling Fragmentation Pattern
	48	2.08067	1.16681
	49	6.12189	3.42975
	50	20.5612	12.1724
	51	23.9482	12.9173
	52	25.9667	14.7272
	53	19.8303	12.0229
	54	20.0331	10.4459
	55	36.6045	29.7471
	56	75.3803	57.2434
	57	63.6446	5.91505
	58	46.5696	31.0807
	59	80.2798	24.5541
	60	100	100
	61	65.8671	4.45574
	62	26.3063	23.4851
	63	44.593	1.05069
	64	45.5768	48.9267
	65	1.98909	2.19407

## Sheet: 13C Corrections
			m/z		H8	H7	H6	H5	H4	H3	H2	H1	H0		Experimental scaled abundance		Experimental Normalized Abundance	m/z
			48		0	0	0	0	0	0	0	0	0.956372		0.59		0.00301759	48
			49		0	0	0	0	0	0	0	0.956372	0.0429004		3.46		0.0176964	49
			50		0	0	0	0	0	0	0.956372	0.0429004	0.000721652		12.43		0.0635741	50
			51		0	0	0	0	0	0.956372	0.0429004	0.000721652	5.39525e-06		10.27		0.0525266	51
			52		0	0	0	0	0.956372	0.0429004	0.000721652	5.39525e-06	1.51261e-08		3.05		0.0155994	52
			53		0	0	0	0.956372	0.0429004	0.000721652	5.39525e-06	1.51261e-08	0		13.76		0.0703764	53
			54		0	0	0.956372	0.0429004	0.000721652	5.39525e-06	1.51261e-08	0	0		4.9		0.0250614	54
			55		0	0.956372	0.0429004	0.000721652	5.39525e-06	1.51261e-08	0	0	0		47.06		0.240691	55
			56		0.956372	0.0429004	0.000721652	5.39525e-06	1.51261e-08	0	0	0	0		100		0.511457	56
			57		0.0429004	0.000721652	5.39525e-06	1.51261e-08	0	0	0	0	0
														0.999273	195.52
																	Calculated Relative Fragmentation contribution	Calculated Normalized Fragmentation amount
					4.31574e-14	-2.79884e-12	1.74703e-10	-1.03857e-08	5.78815e-07	-2.94936e-05	0.00131499	-0.0469038	1.04562		102.361	H8	1	0.511748
					-2.79884e-12	1.74703e-10	-1.03857e-08	5.78815e-07	-2.94936e-05	0.00131499	-0.0469038	1.04562	0		48.995	H7	0.478651	0.244949
					1.74703e-10	-1.03857e-08	5.78815e-07	-2.94936e-05	0.00131499	-0.0469038	1.04562	0	0		4.48185	H6	0.0437849	0.0224068
					-1.03857e-08	5.78815e-07	-2.94936e-05	0.00131499	-0.0469038	1.04562	0	0	0		14.2578	H5	0.13929	0.0712813
					5.78815e-07	-2.94936e-05	0.00131499	-0.0469038	1.04562	0	0	0	0		2.72368	H4	0.0266087	0.0136169
					-2.94936e-05	0.00131499	-0.0469038	1.04562	0	0	0	0	0		10.16	H3	0.0992571	0.0507946
					0.00131499	-0.0469038	1.04562	0	0	0	0	0	0		12.8355	H2	0.125395	0.0641707
					-0.0469038	1.04562	0	0	0	0	0	0	0		3.59016	H1	0.0350737	0.0179489
					1.04562	0	0	0	0	0	0	0	0		0.616914	H0	0.00602688	0.00308424
															200.021
	12C %	13C %
	98.891	1.109
	0.98891	0.01109
	12C4	12C3 13C	12C2 13C2	12C 13C3	13C4
	0.956372	0.0429004	0.000721652	5.39525e-06	1.51261e-08		1

## Sheet: Cossee-Arlman Mechanism Predict
Cossee-Arlman Mechanism Predicted Distribution
Input
C2D4	C2D3H	C2D2H2	C2DH3	C2H4			Ni-H standin	Ni-D standin		Ni-H	Ni-D
1	0	0	0	1			4	4		0.5	0.5
1	0.75	0.5	0.25	0	D %
0	0.25	0.5	0.75	1	H %
C2H5	C2H4D	C2H3D2	C2H2D3	C2HD4	C2D5
0.5	0.5	0	0	0.5	0.5
C4H8	C4H7D	C4H6D2	C4H5D3	C4H4D4	C4H3D5	C4D6H2	C4D7H	C4D8
0.5	0.5	0	0.5	1	0.5	0	0.5	0.5
Scaled
C4H8	C4H7D	C4H6D2	C4H5D3	C4H4D4	C4H3D5	C4D6H2	C4D7H	C4D8
1	1	0	1	2	1	0	1	1
C4D8	C4D7H	C4D6H2	C4H3D5	C4H4D4	C4H5D3	C4H6D2	C4H7D	C4H8
1	1	0	1	2	1	0	1	1

## Sheet: Oxidative Coup Mechanism Predic
Oxidative Coupling Mechanism Predicted Distribution
Input
C2D4	C2D3H	C2D2H2	C2DH3	C2H4
1	0	0	0	1
C4D8	C4D7H	C4D6H2	C4D5H3	C4D4H4	C4D3H5	C4H6D2	C4H7D	C4H8
1	0	0	0	2	0	0	0	1
Scaled
C4D8	C4D7H	C4D6H2	C4D5H3	C4D4H4	C4D3H5	C4H6D2	C4H7D	C4H8
1	0	0	0	2	0	0	0	1

## Sheet: Cummulative Fragmentations
C4D8										C4D7H											C4D6H2											C4D5H3											C4D4H4
fragment	tree %	frag. %	overall %	m/z						fragment	tree %	frag. %	overall %	m/z							fragment	tree %	frag. %	overall %	m/z							fragment	tree %	frag. %	overall %	m/z							fragment	tree %	frag. %	overall %	m/z
C4D8	100	1	100	64						C4D7H	100	1	100	63							C4D6H2	100	1	100	62							C4D5H3	100	1	100	61							C4D4H4	100	1	100	60
C4D7	100	0.478651	47.8651	62						C4D6H	87.5	0.478651	41.882	61							C4D5H2	75	0.478651	35.8988	60							C4D4H3	62.5	0.478651	29.9157	59							C4D3H4	50	0.478651	23.9325	58
C4D6	100	0.0437849	4.37849	60						C4D7	12.5	0.478651	5.98314	62							C4D6H	25	0.478651	11.9663	61							C4D5H2	37.5	0.478651	17.9494	60							C4D4H3	50	0.478651	23.9325	59
C4D5	100	0.13929	13.929	58						C4D5H	75	0.0437849	3.28387	59							C4D4H2	53.57	0.0437849	2.34556	58							C4D3H3	35.71	0.0437849	1.56356	57							C4D2H4	21.43	0.0437849	0.938311	56
C4D4	100	0.0266087	2.66087	56						C4D6	25	0.0437849	1.09462	60							C4D5H	42.48	0.0437849	1.85998	59							C4D4H2	53.58	0.0437849	2.346	58							C4D3H3	57.14	0.0437849	2.50187	57
C4D3	100	0.0992571	9.92571	54						C4D4H	62.5	0.13929	8.70562	57							C4D6	3.57	0.0437849	0.156312	60							C4D5H	10.71	0.0437849	0.468936	59							C4D4H2	21.43	0.0437849	0.938311	58
C4D2	100	0.125395	12.5395	52						C4D5	37.5	0.13929	5.22337	58							C4D3H2	35.71	0.13929	4.97404	56							C4D2H3	17.86	0.13929	2.48772	55							C4DH4	7.14	0.13929	0.99453	54
C4D1	100	0.0350737	3.50737	50						C4D3H	50	0.0266087	1.33043	55							C4D4H	53.58	0.13929	7.46315	57							C4D3H2	53.58	0.13929	7.46315	56							C4D2H3	42.86	0.13929	5.96996	55
C4	100	0.00602688	0.602688	48						C4D4	50	0.0266087	1.33043	56							C4D5	10.71	0.13929	1.49179	58							C4D4H	26.78	0.13929	3.73018	57							C4D3H2	42.86	0.13929	5.96996	56
										C4D2H	37.5	0.0992571	3.72214	53							C4D2H2	21.43	0.0266087	0.570224	54							C4D5	1.78	0.13929	0.247936	58							C4D4H	7.14	0.13929	0.99453	57
										C4C3	62.5	0.0992571	6.20357	54							C4D3H	57.14	0.0266087	1.52042	55							C4DH3	7.14	0.0266087	0.189986	53							C4H4	1.42	0.0266087	0.0377843	52
										C4DH	25	0.125395	3.13488	51							C4D4	21.43	0.0266087	0.570224	56							C4D2H2	42.86	0.0266087	1.14045	54							C4DH3	22.86	0.0266087	0.608274	53
										C4D2	75	0.125395	9.40464	52							C4DH2	10.71	0.0992571	1.06304	52							C4D3H	42.86	0.0266087	1.14045	55							C4D2H2	51.42	0.0266087	1.36822	54
										C4H	12.5	0.0350737	0.438421	49							C4D2H	53.57	0.0992571	5.31721	53							C4D4	7.14	0.0266087	0.189986	56							C4D3H	22.86	0.0266087	0.608274	55
										C4D	87.5	0.0350737	3.06895	50							C4D3	35.72	0.0992571	3.54547	54							C4H3	1.78	0.0992571	0.176678	51							C4D4	1.43	0.0266087	0.0380504	56
										C4	100	0.00602688	0.602688	48							C4H2	3.57	0.125395	0.447661	50							C4DH2	26.79	0.0992571	2.6591	52							C4H3	7.14	0.0992571	0.708696	51
																					C4DH	42.85	0.125395	5.37318	51							C4D2H	53.58	0.0992571	5.3182	53							C4DH2	42.86	0.0992571	4.25416	52
																					C4D2	53.58	0.125395	6.71867	52							C4D3	17.85	0.0992571	1.77174	54							C4D2H	42.86	0.0992571	4.25416	53
																					C4H	25	0.0350737	0.876843	49							C4H2	10.71	0.125395	1.34298	50							C4D3	7.14	0.0992571	0.708696	54
																					C4D	75	0.0350737	2.63053	50							C4DH	53.58	0.125395	6.71867	51							C4H2	21.43	0.125395	2.68722	50
																					C4	100	0.00602688	0.602688	48							C4D2	35.71	0.125395	4.47786	52							C4DH	57.14	0.125395	7.16508	51
																																C4H	37.5	0.0350737	1.31526	49							C4D2	21.43	0.125395	2.68722	52
																																C4D	62.5	0.0350737	2.19211	50							C4H	50	0.0350737	1.75369	49
																																C4	100	0.00602688	0.602688	48							C4D	50	0.0350737	1.75369	50
																																											C4	100	0.00602688	0.602688	48
C4D8										C4D7H											C4D6H2											C4D5H3											C4D4H4
m/z	sum intensity	13C Offset	13C2 Offset	13C3 Offset	13C4 Offset	Overall Intensity	Scaled Intensity			m/z	sum intensity	13C Offset	13C2 Offset	13C3 Offset	13C4 Offset	Overall Intensity	Scaled Intensity				m/z	sum intensity	13C Offset	13C2 Offset	13C3 Offset	13C4 Offset	Overall Intensity	Scaled Intensity				m/z	sum intensity	13C Offset	13C2 Offset	13C3 Offset	13C4 Offset	Overall Intensity	Scaled Intensity				m/z	sum intensity	13C Offset	13C2 Offset	13C3 Offset	13C4 Offset	Overall Intensity
48	0.602688	0	0	0	0	0.576394	0.60247			48	0.602688	0	0	0	0	0.576394	0.600885				48	0.602688	0	0	0	0	0.576394	0.599308				48	0.602688	0	0	0	0	0.576394	0.597738				48	0.602688	0	0	0	0	0.576394
49	0	0.0258556	0	0	0	0.0258556	0.0270253			49	0.438421	0.0258556	0	0	0	0.44515	0.464064				49	0.876843	0.0258556	0	0	0	0.864444	0.898809				49	1.31526	0.0258556	0	0	0	1.28374	1.33128				49	1.75369	0.0258556	0	0	0	1.70303
50	3.50737	0	0.000434931	0	0	3.35479	3.50656			50	3.06895	0.0188085	0.000434931	0	0	2.9543	3.07983				50	3.07819	0.037617	0.000434931	0	0	2.98195	3.10049				50	3.53509	0.0564254	0.000434931	0	0	3.43772	3.56502				50	4.4409	0.0752339	0.000434931	0	0	4.32283
51	0	0.150468	0	3.25165e-06	0	0.150471	0.157278			51	3.13488	0.131659	0.000316388	3.25165e-06	0	3.13009	3.26309				51	5.37318	0.132056	0.000632776	3.25165e-06	0	5.27146	5.48102				51	6.89535	0.151657	0.000949163	3.25165e-06	0	6.74713	6.99698				51	7.87378	0.190517	0.00126555	3.25165e-06	0	7.72205
52	12.5395	0	0.0025311	0	9.1163e-09	11.995	12.5376			52	9.40464	0.134488	0.00221471	2.36539e-06	9.1163e-09	9.13104	9.51902				52	7.78172	0.230512	0.00222138	4.73079e-06	9.1163e-09	7.67496	7.98007				52	7.13696	0.295814	0.00255111	7.09618e-06	9.1163e-09	7.12397	7.38777				52	6.97916	0.337789	0.00320479	9.46157e-06	9.1163e-09	7.01568
53	0	0.537951	0	1.89231e-05	0	0.53797	0.562308			53	3.72214	0.403463	0.00226229	1.65577e-05	6.6316e-09	3.9655	4.13399				53	5.31721	0.333839	0.00387757	1.66076e-05	1.32632e-08	5.42296	5.63854				53	5.50818	0.306179	0.00497605	1.90727e-05	1.98948e-08	5.57905	5.78564				53	4.86244	0.299409	0.00568213	2.39598e-05	2.65264e-08	4.95541
54	9.92571	0	0.00904917	0	5.30528e-08	9.50173	9.93159			54	6.20357	0.159682	0.00678688	1.69135e-05	4.64212e-08	6.09941	6.35858				54	4.11569	0.22811	0.00561569	2.89897e-05	4.65609e-08	4.16989	4.33565				54	2.91219	0.236304	0.0051504	3.72021e-05	5.3472e-08	3.02663	3.1387				54	3.07144	0.208601	0.00503653	4.2481e-05	6.71735e-08	3.15112
55	0	0.425818	0	6.76538e-05	0	0.425885	0.445152			55	1.33043	0.266136	0.00268609	5.07404e-05	4.74184e-08	1.54126	1.60675				55	1.52042	0.176565	0.00383717	4.19843e-05	8.12752e-08	1.63453	1.69951				55	3.62816	0.124934	0.00397499	3.85057e-05	1.043e-07	3.59882	3.73209				55	6.57824	0.131766	0.00350899	3.76543e-05	1.19099e-07	6.42656
56	2.66087	0	0.00716291	0	1.89674e-07	2.55194	2.66739			56	1.33043	0.0570762	0.00447682	2.00819e-05	1.42255e-07	1.33396	1.39064				56	5.54426	0.0652266	0.0029701	2.86876e-05	1.17707e-07	5.37061	5.58411				56	7.65314	0.15565	0.00210159	2.9718e-05	1.07954e-07	7.47703	7.75391				56	6.94632	0.282209	0.00221651	2.6234e-05	1.05567e-07	6.92773
57	0	0.114152	0	5.35517e-05	0	0.114206	0.119373			57	8.70562	0.0570762	0.00096011	3.34698e-05	5.63014e-08	8.38388	8.74012				57	7.46315	0.237851	0.00109721	2.22052e-05	8.04284e-08	7.37652	7.66977				57	5.29374	0.328323	0.00261827	1.5712e-05	8.33172e-08	5.39375	5.59348				57	3.4964	0.298	0.0047472	1.65712e-05	7.35495e-08	3.64662
58	13.929	0	0.00192022	0	1.50137e-07	13.3232	13.926			58	5.22337	0.373475	0.00096011	7.17802e-06	9.38357e-08	5.36993	5.5981				58	3.83735	0.320173	0.00400103	8.20304e-06	6.22542e-08	3.99412	4.1529				58	2.59393	0.227104	0.0055229	1.95748e-05	4.405e-08	2.71341	2.81389				58	24.8709	0.149997	0.00501283	3.54912e-05	4.64589e-08	23.9408
59	0	0.59756	0	1.4356e-05	0	0.597574	0.624609			59	3.28387	0.224085	0.00628243	7.17802e-06	2.01242e-08	3.37098	3.51421				59	1.85998	0.164624	0.0053858	2.99127e-05	2.2998e-08	1.94888	2.02635				59	30.3846	0.111281	0.00382024	4.12906e-05	5.48799e-08	29.1742	30.2545				59	23.9325	1.06697	0.00252318	3.74771e-05	9.95029e-08	23.958
60	4.37849	0	0.0100519	0	4.02484e-08	4.19752	4.38742			60	1.09462	0.140879	0.00376946	4.6969e-05	2.01242e-08	1.19156	1.24219				60	36.0551	0.0797941	0.00276923	4.02656e-05	8.3863e-08	34.5647	35.9388				60	17.9494	1.30351	0.00187192	2.8561e-05	1.15762e-07	18.4717	19.1557				60	100	1.02672	0.0179481	1.88639e-05	1.05071e-07	96.6819
61	0	0.187839	0	7.51503e-05	0	0.187914	0.196416			61	41.882	0.0469598	0.00236981	2.81814e-05	1.31682e-07	40.1041	41.8081				61	11.9663	1.54678	0.00134226	2.07035e-05	1.12888e-07	12.9924	13.5088				61	100	0.770038	0.0219271	1.39949e-05	8.00735e-08	96.4292	100				61	0	4.29004	0.017271	0.000134184	5.28868e-08	4.30745
62	47.8651	0	0.00315975	0	2.10691e-07	45.78	47.8511			62	5.98314	1.79675	0.000789937	1.77173e-05	7.90091e-08	7.51967	7.83918				62	100	0.513358	0.0260193	1.00351e-05	5.80441e-08	96.1766	100				62	0	4.29004	0.0129532	0.000163933	3.9236e-08	4.30316	4.46251				62	0	0	0.0721652	0.000129122	3.76198e-07	0.0722947
63	0	2.05343	0	2.3623e-05	0	2.05346	2.14636			63	100	0.256679	0.0302242	5.90576e-06	4.9672e-08	95.9242	100				63	0	4.29004	0.00863549	0.000194526	2.81342e-08	4.29887	4.46977				63	0	0	0.0721652	9.68415e-05	4.596e-07	0.0722625	0.0749384				63	0	0	0	0.000539525	3.62005e-07	0.000539887
64	100	0	0.0345419	0	6.62294e-08	95.6718	100			64	0	4.29004	0.00431774	0.000225964	1.65573e-08	4.29459	4.47707				64	0	0	0.0721652	6.4561e-05	5.45372e-07	0.0722303	0.0751017				64	0	0	0	0.000539525	2.71504e-07	0.000539796	0.000559785				64	0	0	0	0	1.51261e-06	1.51261e-06
65	0	4.29004	0	0.000258244	0	4.2903	4.4844			65	0	0	0.0721652	3.22805e-05	6.33509e-07	0.0721981	0.0752658				65	0	0	0	0.000539525	1.81003e-07	0.000539706	0.000561161				65	0	0	0	0	1.51261e-06	1.51261e-06	1.56862e-06				65	0	0	0	0	0	0
[truncated: 33 more columns]

## Sheet: Cossee Arlman Fit
	C4D8	C4D7H	C4D6H2	C4D5H3	C4D4H4	C4D3H5	C4H6D2	C4H7D	C4H8
m/z	1	1	0	1	2	1	0	1	1		Raw Predicted Isotopomer Distribution		Normalized Predicted Isotopomer Distribution
48	0.60247	0.600885	0.599308	0.597738	0.596176	0.594621	0.593073	0.591533	0.59		4.7696		2.08067
49	0.0270253	0.464064	0.898809	1.33128	1.76148	2.18944	2.61517	3.03868	3.46		14.0334		6.12189
50	3.50656	3.07983	3.10049	3.56502	4.47119	5.81305	7.59091	9.79644	12.43		47.1333		20.5612
51	0.157278	3.26309	5.48102	6.99698	7.98707	8.63479	9.11361	9.60125	10.27		54.8975		23.9482
52	12.5376	9.51902	7.98007	7.38777	7.25646	7.13955	6.63337	5.37751	3.05		59.5244		25.9667
53	0.562308	4.13399	5.63854	5.78564	5.12548	4.30287	4.29655	6.66192	13.76		45.4577		19.8303
54	9.93159	6.35858	4.33565	3.1387	3.25927	5.16403	8.24368	9.91119	4.9		45.9226		20.0331
55	0.445152	1.60675	1.69951	3.73209	6.64711	8.23979	7.10594	9.53184	47.06		83.9099		36.6045
56	2.66739	1.39064	5.58411	7.75391	7.16548	5.13225	14.392	41.5221	100		172.797		75.3803
57	0.119373	8.74012	7.66977	5.59348	3.77177	19.4718	35.963	100	4.42669		145.895		63.6446
58	13.926	5.5981	4.1529	2.81389	24.7625	30.3825	100	4.43379	0.0741331		106.753		46.5696
59	0.624609	3.51421	2.02635	30.2545	24.7802	100	4.44092	0.0742927	0.000553001		184.028		80.2798
60	4.38742	1.24219	35.9388	19.1557	100	4.44808	0.074453	0.000554345	1.54831e-06		229.234		100
61	0.196416	41.8081	13.5088	100	4.45528	0.074614	0.000555696	1.55234e-06	0		150.99		65.8671
62	47.8511	7.83918	100	4.46251	0.0747758	0.000557052	1.55638e-06	0	0		60.3029		26.3063
63	2.14636	100	4.46977	0.0749384	0.000558415	1.56044e-06	0	0	0		102.222		44.593
64	100	4.47707	0.0751017	0.000559785	1.56452e-06	0	0	0	0		104.478		45.5768
65	4.4844	0.0752658	0.000561161	1.56862e-06	0	0	0	0	0		4.55966		1.98909

## Sheet: Oxid Coup Fit
	C4D8	C4D7H	C4D6H2	C4D5H3	C4D4H4	C4D3H5	C4H6D2	C4H7D	C4H8
m/z	1	0	0	0	2	0	0	0	1		Raw Predicted Isotopomer Distribution		Normalized Predicted Isotopomer Distribution
48	0.60247	0.600885	0.599308	0.597738	0.596176	0.594621	0.593073	0.591533	0.59		2.38482		1.16681
49	0.0270253	0.464064	0.898809	1.33128	1.76148	2.18944	2.61517	3.03868	3.46		7.00998		3.42975
50	3.50656	3.07983	3.10049	3.56502	4.47119	5.81305	7.59091	9.79644	12.43		24.8789		12.1724
51	0.157278	3.26309	5.48102	6.99698	7.98707	8.63479	9.11361	9.60125	10.27		26.4014		12.9173
52	12.5376	9.51902	7.98007	7.38777	7.25646	7.13955	6.63337	5.37751	3.05		30.1006		14.7272
53	0.562308	4.13399	5.63854	5.78564	5.12548	4.30287	4.29655	6.66192	13.76		24.5733		12.0229
54	9.93159	6.35858	4.33565	3.1387	3.25927	5.16403	8.24368	9.91119	4.9		21.3501		10.4459
55	0.445152	1.60675	1.69951	3.73209	6.64711	8.23979	7.10594	9.53184	47.06		60.7994		29.7471
56	2.66739	1.39064	5.58411	7.75391	7.16548	5.13225	14.392	41.5221	100		116.998		57.2434
57	0.119373	8.74012	7.66977	5.59348	3.77177	19.4718	35.963	100	4.42669		12.0896		5.91505
58	13.926	5.5981	4.1529	2.81389	24.7625	30.3825	100	4.43379	0.0741331		63.5251		31.0807
59	0.624609	3.51421	2.02635	30.2545	24.7802	100	4.44092	0.0742927	0.000553001		50.1855		24.5541
60	4.38742	1.24219	35.9388	19.1557	100	4.44808	0.074453	0.000554345	1.54831e-06		204.387		100
61	0.196416	41.8081	13.5088	100	4.45528	0.074614	0.000555696	1.55234e-06	0		9.10697		4.45574
62	47.8511	7.83918	100	4.46251	0.0747758	0.000557052	1.55638e-06	0	0		48.0007		23.4851
63	2.14636	100	4.46977	0.0749384	0.000558415	1.56044e-06	0	0	0		2.14747		1.05069
64	100	4.47707	0.0751017	0.000559785	1.56452e-06	0	0	0	0		100		48.9267
65	4.4844	0.0752658	0.000561161	1.56862e-06	0	0	0	0	0		4.4844		2.19407
